# Supplementary material for: Highly efficient degradation of polyesters and polyethers by decatungstate photocatalysis
Source: Royal Society of Chemistry journal article supplement (doi:10.1039/d3nr03978a), 2023-01-01
Supplement: d3nr03978a1.pdf [file d3nr03978a1.pdf]

Electronic Supplementary Information (ESI) for

## Highly efficient degradation of polyesters and polyethers by decatungstate photocatalysis

Chifeng Li, Chen Gu, Kazuya Yamaguchi and Kosuke Suzuki\*

*Department of Applied Chemistry, School of Engineering, The University of Tokyo, 7-3-1 Hongo, Bunkyo-ku, Tokyo 113-8656, Japan. E-mail: ksuzuki@appchem.t.u-tokyo.ac.jp.*

| Contents                | page  |
|-------------------------|-------|
| 1. Experimental Section | S1–S2 |
| 2. Fig. S1–S4           | S3–S4 |
| 3. Table S1–S3          | S5–S7 |
| 4. References           | S8    |

### Experimental Section

**Reagents.** Acetonitrile (Kanto Chemical), Na<sub>2</sub>WO<sub>4</sub>·2H<sub>2</sub>O (Nippon Inorganic Color and Chemical), TiO<sub>2</sub> ST-01 (Ishihara Sangyo), TiO<sub>2</sub> P25 (Nippon Aerosil, JRC-TIO-17), Ru(bpy)<sub>3</sub>Cl<sub>2</sub>·6H<sub>2</sub>O (Tokyo Chemical Industry), eosin Y (Sigma-Aldrich), methylene blue (Tokyo Chemical Industry), 5,10,15,20-Tetraphenyl-21H,23H-porphyrin (tetraphenyl porphyrin, Fujifilm Wako), 2,2,6,6-tetramethylpiperidine 1-oxyl (TEMPO, Tokyo Chemical Industry), 3,5-di-*tert*-butyl-4-hydroxytoluene (BHT, Tokyo Chemical Industry), polycaprolactone (PCL, Sigma-Aldrich), poly(1,4-butylene adipate) (PBA, Sigma-Aldrich), cellulose acetate (CA, Sigma-Aldrich), poly(tetrahydrofuran) (PTHF, Sigma-Aldrich), poly(propylene glycol) (PPG, Sigma-Aldrich), poly(methyl methacrylate) (PMMA, Sigma-Aldrich), and polyethylene glycol (PEG, Tokyo Chemical Industry) were obtained from the respective suppliers. TBA<sub>4</sub>[W<sub>10</sub>O<sub>32</sub>] (TBAW10),<sup>1</sup> TBA<sub>3</sub>[α-PW<sub>12</sub>O<sub>40</sub>],<sup>2</sup> TBA<sub>5</sub>[α-PV<sub>2</sub>W<sub>10</sub>O<sub>40</sub>],<sup>3</sup> TBA<sub>4</sub>H[γ-PV<sub>2</sub>W<sub>10</sub>O<sub>40</sub>],<sup>4</sup> TBA<sub>4</sub>H<sub>2</sub>[γ-SiV<sub>2</sub>W<sub>10</sub>O<sub>40</sub>],<sup>5</sup> and

TBA<sub>3</sub>H<sub>3</sub>[V<sub>10</sub>O<sub>28</sub>]<sup>6-</sup> were synthesized according to the reported procedures, and characterized by CSI mass, IR, and/or NMR spectra.

**Instruments.** IR spectra were measured on a JASCO FT/IR-4100 spectrometer using KCl disks. CSI mass spectra were recorded on a JEOL JMS-T100CS spectrometer. NMR spectra were recorded on a JEOL ECA-500 spectrometer (<sup>1</sup>H, 500.16 MHz) using 5 mm tubes. The number average molecular weights ( $M_n$ ) and weight average molecular weights ( $M_w$ ) were determined by gel permeation chromatography (GPC; Shimadzu LabSolutions system, LC-20AD, CTO-20AC column oven, Shodex RI Detector RI-504, two sets of TOSOH TSKgel superHM-N columns (6.0 mm I.D. × 15 cm, 3 μm). For the analysis, samples were dissolved in tetrahydrofuran (THF, concentration ~ 10 mg/mL), and THF was used as the mobile phase at a flow rate of 0.6 mL/min at 25 °C. Calibration of the GPC analysis was carried out using polystyrene standard kit (TOSOH PStQuick E and F). The program allows calculating from the differential distribution curve of molecular weights,  $M_n$ ,  $M_w$ ,  $M_z$  and other parameters.

| Entry | Catalyst | Time (h) | $M_n$ (kg mol <sup>-1</sup> ) | $M_w$ (kg mol <sup>-1</sup> ) | $M_w/M_n$ | $(M_{w0}-M_w)/M_{w0}$ (%) |
|-------|----------|----------|-------------------------------|-------------------------------|-----------|---------------------------|
| 1     |          | 0        | 13.7                          | 22.0                          | 1.61      | 0                         |
| 2     | TBAW10   | 1        | 3.21                          | 6.80                          | 2.12      | 69                        |
| 3     |          | 2        | 1.76                          | 3.12                          | 1.78      | 86                        |
| 4     |          | 4        | 1.20                          | 1.87                          | 1.56      | 91                        |
| 5     |          | W/O      | 4                             | 12.6                          | 21.6      | 1.71                      |

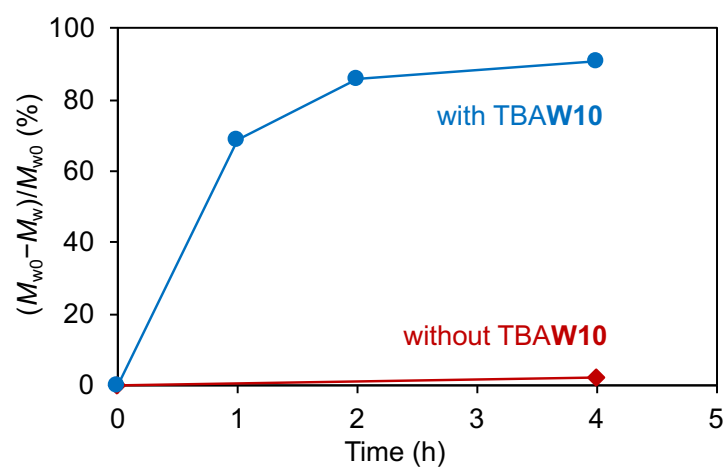

**Fig. S1** Reaction profile for the degradation of PCL by TBAW10 photocatalysis. Reaction conditions: PCL (40 mg), with or without TBAW10 (10 wt%), acetonitrile (4 mL), photo-irradiation (xenon lamp,  $\lambda > 350$  nm), O<sub>2</sub> (1 atm), 4 h.

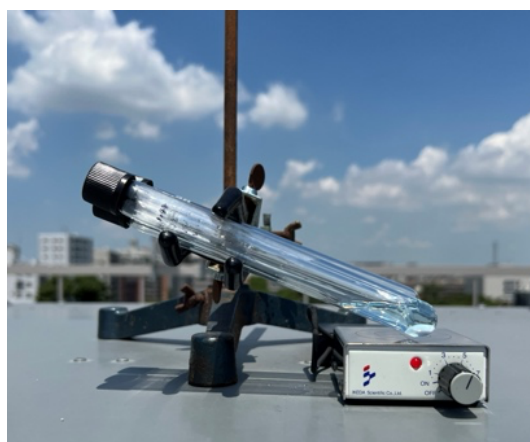

**Fig. S2** A photograph of a polymer degradation experiment under sunlight on July 31, 2023, for 5 h (10:25 AM – 3:25 PM) at the University of Tokyo, Tokyo, Japan (35°42'53"N 139°45'34"E).

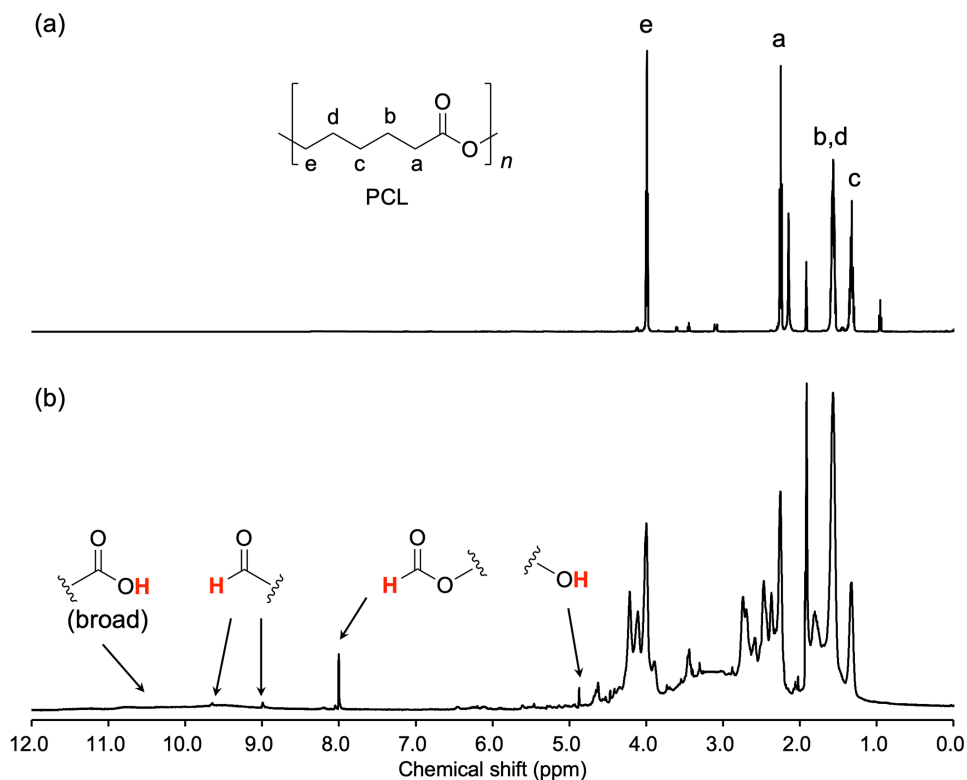

**Fig. S3**  $^1\text{H}$  NMR spectra of the reaction solution of PCL degradation by TBAW10 photocatalysis in acetonitrile- $d_3$ . (a) Before reaction, (b) after photo-irradiation for 4 h.

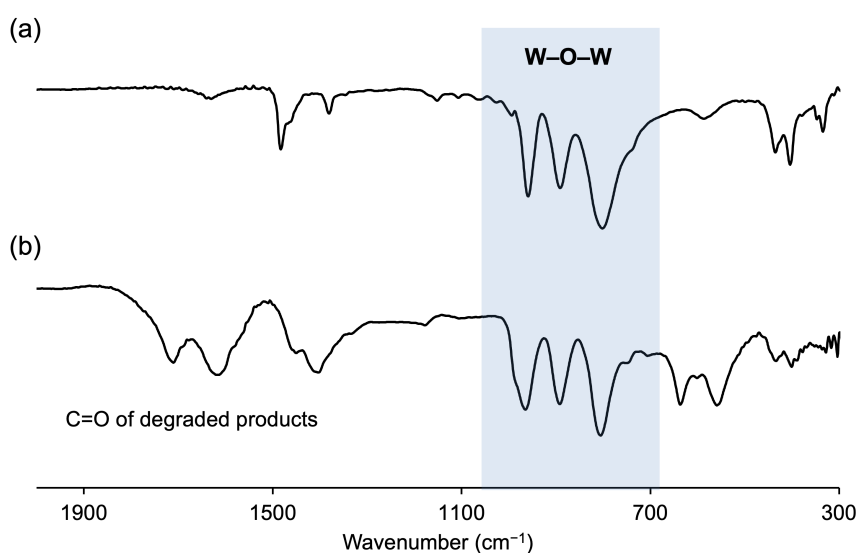

**Fig. S4** IR spectra of TBAW10 (a) before and (b) after the PCL degradation in acetonitrile.

**Table S1** Degradation of PCL using different amounts of TBAW10<sup>a</sup>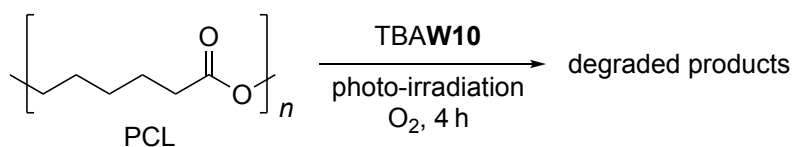<sup>a</sup>Reaction conditions: PCL (40 mg), TBAW10 (0, 0.5, 1.0, 2.5, 5.0, 10 wt%),

| Entry | Catalyst (wt%)    | $M_w$ (kg mol <sup>-1</sup> ) | $(M_{w0}-M_w)/M_{w0}$ (%) |
|-------|-------------------|-------------------------------|---------------------------|
| 1     | (Before reaction) | 22.0 ( $M_{w0}$ )             | –                         |
| 2     | TBAW10 (10)       | 1.87                          | 91                        |
| 3     | TBAW10 (5.0)      | 6.51                          | 70                        |
| 4     | TBAW10 (2.5)      | 8.64                          | 61                        |
| 5     | TBAW10 (1.0)      | 16.0                          | 27                        |
| 6     | TBAW10 (0.5)      | 18.4                          | 16                        |
| 7     | W/O               | 21.6                          | 2                         |

acetonitrile (4 mL), photo-irradiation (xenon lamp,  $\lambda > 350$  nm), O<sub>2</sub> (1 atm), 4 h.

**Table S2** Degradation of PCL by TBAW10 photocatalysis in the presence of radical scavengers<sup>a</sup>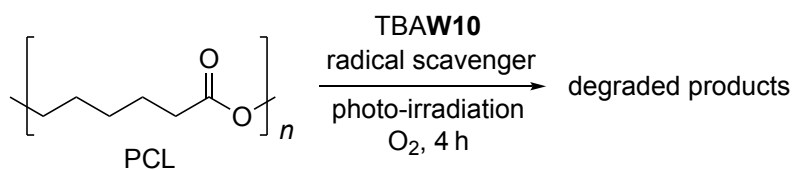

| Entry | Catalyst          | Radical scavenger | $M_w$ (kg mol <sup>-1</sup> ) | $(M_{w0}-M_w)/M_{w0}$ (%) |
|-------|-------------------|-------------------|-------------------------------|---------------------------|
| 1     | (Before reaction) | W/O               | 22.0 ( $M_{w0}$ )             | –                         |
| 2     | TBAW10            | W/O               | 1.87                          | 91                        |
| 3     | W/O               | TEMPO             | 20.8                          | 5                         |
| 4     | TBAW10            | TEMPO             | 21.2                          | 3                         |
| 5     | W/O               | BHT               | 14.4                          | 34                        |
| 6     | TBAW10            | BHT               | 6.68                          | 70                        |

<sup>a</sup>Reaction conditions: PCL (40 mg), TBAW10 (10 wt%), radical scavenger (100 wt%), acetonitrile (4 mL), photo-irradiation (xenon lamp,  $\lambda > 350$  nm), O<sub>2</sub> (1 atm), 4 h.

**Table S3** Degradation of various polymers by **W10** photocatalysis<sup>a</sup>

| Entry           | Polymer | Catalyst                | $M_w$ (kg mol <sup>-1</sup> ) | $(M_{w0}-M_w)/M_{w0}$ (%) |
|-----------------|---------|-------------------------|-------------------------------|---------------------------|
| 1               | PCL     | W/O (before reaction)   | 22.0 ( $M_{w0}$ )             | –                         |
| 2               | PCL     | W/O                     | 21.6                          | 2                         |
| 3               | PCL     | <b>TBAW10</b>           | 1.87                          | 91                        |
| 4               | PBA     | W/O (before reaction)   | 7.30 ( $M_{w0}$ )             | –                         |
| 5               | PBA     | W/O                     | 7.14                          | 2                         |
| 6               | PBA     | <b>TBAW10</b>           | 1.16                          | 84                        |
| 7               | PPG     | W/O (before reaction)   | 5.38 ( $M_{w0}$ )             | –                         |
| 8               | PPG     | W/O                     | 5.19                          | 4                         |
| 9               | PPG     | <b>TBAW10</b>           | 0.27                          | 95                        |
| 10              | CA      | W/O (before reaction)   | 83.4 ( $M_{w0}$ )             | –                         |
| 11              | CA      | W/O                     | 81.7                          | 2                         |
| 12              | CA      | <b>TBAW10</b>           | 6.50                          | 92                        |
| 13              | PTHF    | W/O (before reaction)   | 9.22 ( $M_{w0}$ )             | –                         |
| 14              | PTHF    | W/O                     | 8.93                          | 3                         |
| 15              | PTHF    | <b>TBAW10</b>           | 0.15                          | 98                        |
| 16              | PMMA    | W/O (before reaction)   | 65.0 ( $M_{w0}$ )             | –                         |
| 17              | PMMA    | W/O                     | 63.5                          | 2                         |
| 18              | PMMA    | <b>TBAW10</b>           | 18.9                          | 71                        |
| 19              | PEG     | W/O (before reaction)   | 13.4 ( $M_{w0}$ )             | –                         |
| 20 <sup>b</sup> | PEG     | W/O                     | 12.7                          | 5                         |
| 21 <sup>b</sup> | PEG     | <b>NaW10</b>            | 0.89                          | 93                        |
| 23 <sup>c</sup> | PEG     | W/O, sunlight           | 12.0                          | 11                        |
| 24 <sup>c</sup> | PEG     | <b>NaW10</b> , sunlight | 0.36                          | 97                        |

<sup>a</sup>Reaction conditions: polymer (40 mg), **TBAW10** (10 wt%), acetonitrile (4 mL), photo-irradiation (xenon lamp,  $\lambda > 350$  nm), O<sub>2</sub> (1 atm), 4 h. <sup>b</sup>PEG (40 mg), **NaW10** (3 mg), water (4 mL), photo-irradiation (xenon lamp,  $\lambda > 350$  nm), O<sub>2</sub> (1 atm), 2 h. <sup>c</sup>PEG (40 mg), **NaW10** (3 mg), water (4 mL), sunlight, O<sub>2</sub> (1 atm), 5 h.

## References

---

- 1 M. Fournier, *Inorg. Synth.*, 1990, **27**, 81.
- 2 E. Takahashi, K. Kamata, Y. Kikukawa, S. Sato, K. Suzuki, K. Yamaguchi and N. Mizuno, *Catal. Sci. Technol.*, 2015, **5**, 4778.
- 3 W.-L. Huang, L. Todaro, G. P. A. Yap, R. Beer, L. C. Francesconi and T. Polenova, *J. Am. Chem. Soc.*, 2004, **126**, 11564.
- 4 K. Kamata, K. Yonehara, Y. Nakagawa, K. Uehara and N. Mizuno, *Nat. Chem.*, 2010, **2**, 478.
- 5 Y. Nakagawa, K. Kamata, M. Kotani, K. Yamaguchi and N. Mizuno, *Angew. Chem., Int. Ed.*, 2005, **44**, 5136.
- 6 W. G. Klemperer and M. Yaghi, *Inorg. Synth.*, 1990, **27**, 83.
